# Supplementary material
Source: PubMed Central journal article supplement (PMC3666745)
Supplement: 1303797110_pnas.201303797SI.pdf [file 1303797110_pnas.201303797SI.pdf]

# Supporting Information

Alsterberg et al. 10.1073/pnas.1303797110

**Table S1. ANOVA table on measured response variables**

| Factors                                      | df | MS       | F     | P     |
|----------------------------------------------|----|----------|-------|-------|
| <b>Benthic microalgae biomass</b>            |    |          |       |       |
| W                                            | 1  | 549.20   | 0.98  | 0.331 |
| A                                            | 1  | 318.80   | 0.57  | 0.458 |
| M                                            | 1  | 1,845.90 | 3.28  | 0.080 |
| W × A                                        | 1  | 299.20   | 0.53  | 0.452 |
| W × M                                        | 1  | 549.20   | 0.98  | 0.331 |
| A × M                                        | 1  | 2,196.80 | 3.90  | 0.057 |
| W × A × M                                    | 1  | 299.20   | 0.53  | 0.472 |
| <b>Sediment faunal biomass</b>               |    |          |       |       |
| W                                            | 1  | 0.21     | 14.08 | 0.001 |
| A                                            | 1  | 0.00     | 0.01  | 0.937 |
| M                                            | 1  | 0.54     | 36.88 | 0.000 |
| W × A                                        | 1  | 0.00     | 0.02  | 0.898 |
| W × M                                        | 1  | 0.07     | 5.08  | 0.031 |
| A × M                                        | 1  | 0.02     | 1.13  | 0.290 |
| W × A × M                                    | 1  | 0.00     | 0.00  | 0.958 |
| <b>Benthic microalgae primary production</b> |    |          |       |       |
| W                                            | 1  | 2.02     | 0.05  | 0.825 |
| A                                            | 1  | 195.68   | 4.81  | 0.036 |
| M                                            | 1  | 124.71   | 3.06  | 0.090 |
| W × A                                        | 1  | 131.93   | 3.24  | 0.082 |
| W × M                                        | 1  | 52.54    | 1.29  | 0.265 |
| A × M                                        | 1  | 13.44    | 0.33  | 0.570 |
| W × A × M                                    | 1  | 32.85    | 0.81  | 0.376 |
| <b>Macroalgal biomass</b>                    |    |          |       |       |
| W                                            | 1  | 47.08    | 9.92  | 0.003 |
| A                                            | 1  | 3.77     | 0.79  | 0.379 |
| M                                            | 1  | 76.37    | 16.09 | 0.000 |
| W × A                                        | 1  | 33.70    | 7.10  | 0.012 |
| W × M                                        | 1  | 60.49    | 1.37  | 0.251 |
| A × M                                        | 1  | 0.11     | 0.02  | 0.881 |
| W × A × M                                    | 1  | 0.00     | 0.00  | 0.986 |
| <b>Z. marina biomass</b>                     |    |          |       |       |
| W                                            | 1  | 0.03     | 0.24  | 0.621 |
| A                                            | 1  | 0.47     | 3.31  | 0.078 |
| M                                            | 1  | 7.00     | 47.62 | 0.000 |
| W × A                                        | 1  | 0.04     | 0.29  | 0.592 |
| W × M                                        | 1  | 0.66     | 4.63  | 0.039 |
| A × M                                        | 1  | 0.21     | 1.48  | 0.023 |
| W × A × M                                    | 1  | 0.14     | 0.06  | 0.810 |

Effects of warming (W), ocean acidification (A), and mesograzers presence (M) tested by type I ANOVA on benthic microalgae biomass, benthic microalgae primary production, sediment faunal biomass, macroalgal biomass, and *Zostera marina* biomass.

**Table S2. ANOVA table for mesograzer biomass**

| Variables          | Factors | df | MS   | F    | P     |
|--------------------|---------|----|------|------|-------|
| <i>G. locusta</i>  | W       | 1  | 0.09 | 5.74 | 0.030 |
|                    | A       | 1  | 0.01 | 0.40 | 0.530 |
|                    | W × A   | 1  | 2.11 | 2.11 | 0.160 |
| <i>L. littorea</i> | W       | 1  | 0.01 | 0.22 | 0.640 |
|                    | A       | 1  | 0.12 | 1.95 | 0.180 |
|                    | W × A   | 1  | 0.09 | 1.57 | 0.230 |
| <i>Rissoa</i> sp.  | W       | 1  | 0.00 | 0.19 | 0.670 |
|                    | A       | 1  | 0.00 | 0.01 | 0.910 |
|                    | W × A   | 1  | 0.00 | 0.48 | 0.490 |

Effects of warming (W) and ocean acidification (A) tested by type I ANOVA on biomass of *Gammarus locusta*, *Littorina littorea*, and *Rissoa* sp.

**Table S3. Investigation of model intercepts between groups with chi squares ( $\chi^2$ )**

| Variable                                               | Intercepts different across groups | Intercepts equal across groups | Difference in model $\chi^2$ |
|--------------------------------------------------------|------------------------------------|--------------------------------|------------------------------|
| <b>Model A (benthic microalgae biomass)</b>            |                                    |                                |                              |
| Macroalgae                                             | 16.7                               | 29.6                           | 12.9                         |
| Sediment fauna                                         | 16.7                               | 24.4                           | 7.7                          |
| <i>Zostera</i>                                         | 16.7                               | 37.3                           | 20.6                         |
| Light                                                  | 16.7                               | 16.8                           | 0.1                          |
| Benthic microalgae biomass                             | 16.7                               | 17.8                           | 1.1                          |
| <b>Model B (benthic microalgae primary production)</b> |                                    |                                |                              |
| Macroalgae                                             | 17.2                               | 31.2                           | 14.0                         |
| Sediment fauna                                         | 17.2                               | 24.9                           | 7.7                          |
| <i>Zostera</i>                                         | 17.2                               | 37.9                           | 20.7                         |
| Light                                                  | 17.2                               | 17.4                           | 0.2                          |
| Benthic microalgae primary production                  | 17.2                               | 17.6                           | 0.4                          |

First, all intercepts were allowed to differ across groups. Second, each variable was investigated by setting the intercept as equal across groups, which changed the model  $\chi^2$ . The difference in model  $\chi^2$  indicates whether the intercept is significantly different across groups.

**Table S4. Standardized total, direct, and indirect effects for the group mesograzers absent in model A (BMA biomass)**

|                                      | Warm   | Acid   | Warm × acid | Sediment fauna | Macroalgae | <i>Zostera</i> | Light |
|--------------------------------------|--------|--------|-------------|----------------|------------|----------------|-------|
| <b>Standardized total effects</b>    |        |        |             |                |            |                |       |
| Sediment fauna                       | 0.697  | 0.022  | 0.575       | 0.000          | 0.000      | 0.000          | 0.000 |
| Macroalgae                           | 0.183  | -0.282 | 0.597       | -0.498         | 0.000      | 0.000          | 0.000 |
| <i>Zostera</i>                       | 0.143  | 0.305  | 0.605       | -0.053         | 0.117      | 0.000          | 0.000 |
| Light                                | -0.110 | 0.134  | -0.367      | 0.249          | -0.555     | -0.067         | 0.000 |
| BMA (biomass)                        | -0.210 | 0.099  | 0.350       | -1.004         | -0.598     | 0.007          | 0.217 |
| <b>Standardized direct effects</b>   |        |        |             |                |            |                |       |
| Sediment fauna                       | 0.697  | 0.022  | 0.575       | 0.000          | 0.000      | 0.000          | 0.000 |
| Macroalgae                           | 0.495  | -0.272 | 0.854       | -0.448         | 0.000      | 0.000          | 0.000 |
| <i>Zostera</i>                       | 0.121  | 0.338  | 0.535       | 0.000          | 0.117      | 0.000          | 0.000 |
| Light                                | 0.000  | 0.000  | 0.000       | 0.000          | -0.547     | -0.067         | 0.000 |
| BMA (biomass)                        | 0.786  | -0.044 | 1.435       | -1.272         | -0.480     | 0.021          | 0.217 |
| <b>Standardized indirect effects</b> |        |        |             |                |            |                |       |
| Sediment fauna                       | 0.000  | 0.000  | 0.000       | 0.000          | 0.000      | 0.000          | 0.000 |
| Macroalgae                           | -0.312 | -0.010 | -0.258      | 0.000          | 0.000      | 0.000          | 0.000 |
| <i>Zostera</i>                       | 0.021  | -0.033 | 0.070       | -0.053         | 0.000      | 0.000          | 0.000 |
| Light                                | -0.11  | 0.134  | -0.367      | 0.249          | -0.008     | 0.000          | 0.000 |
| BMA (biomass)                        | -0.995 | 0.143  | -1.085      | 0.268          | -0.118     | -0.015         | 0.000 |

"Total effects" are the sum of all direct and indirect effects. "Direct effects" are the direct effects of one variable on another variable, and "indirect effects" are sum of all products affecting one variable (e.g., the indirect effect of WARM on ALGAE is the product of the path between WARM → FAUNA and FAUNA → ALGAE). BMA, benthic microalgae; PP, primary production.

**Table S5. Standardized total, direct, and indirect effects for the group mesograzers present in model A (BMA biomass)**

|                                      | Warm   | Acid   | Warm × acid | Sediment fauna | Macroalgae | Zostera | Light |
|--------------------------------------|--------|--------|-------------|----------------|------------|---------|-------|
| <b>Standardized total effects</b>    |        |        |             |                |            |         |       |
| Sediment fauna                       | 0.156  | 0.031  | 0.311       | 0.000          | 0.000      | 0.000   | 0.000 |
| Macroalgae                           | -0.071 | -0.175 | 0.406       | 0.243          | 0.000      | 0.000   | 0.000 |
| Zostera                              | 0.128  | 0.319  | -0.025      | 0.023          | 0.095      | 0.000   | 0.000 |
| Light                                | 0.051  | 0.126  | -0.214      | -0.124         | -0.509     | 0.109   | 0.000 |
| BMA biomass                          | 0.283  | -0.144 | 0.159       | 0.071          | -0.087     | -0.006  | 0.318 |
| <b>Standardized direct effects</b>   |        |        |             |                |            |         |       |
| Sediment fauna                       | 0.156  | 0.031  | 0.311       | 0.000          | 0.000      | 0.000   | 0.000 |
| Macroalgae                           | -0.109 | -0.182 | 0.330       | 0.243          | 0.000      | 0.000   | 0.000 |
| Zostera                              | 0.135  | 0.336  | -0.063      | 0.000          | 0.095      | 0.000   | 0.000 |
| Light                                | 0.000  | 0.000  | 0.000       | 0.000          | -0.520     | 0.109   | 0.000 |
| BMA biomass                          | 0.263  | -0.160 | 0.166       | 0.092          | 0.079      | -0.040  | 0.318 |
| <b>Standardized indirect effects</b> |        |        |             |                |            |         |       |
| Sediment fauna                       | 0.000  | 0.000  | 0.000       | 0.000          | 0.000      | 0.000   | 0.000 |
| Macroalgae                           | 0.038  | 0.008  | 0.076       | 0.000          | 0.000      | 0.000   | 0.000 |
| Zostera                              | -0.007 | -0.017 | 0.039       | -0.023         | 0.000      | 0.000   | 0.000 |
| Light                                | 0.051  | 0.126  | -0.214      | -0.124         | 0.010      | 0.000   | 0.000 |
| BMA biomass                          | 0.02   | 0.016  | -0.006      | -0.021         | -0.166     | 0.035   | 0.000 |

Total effects are the sum of all direct and indirect effects. Direct effects are the direct effects of one variable on another variable, and indirect effects are sum of all products affecting one variable (e.g., the indirect effect of WARM on ALGAE is the product of the path between WARM → FAUNA and FAUNA → ALGAE). BMA, benthic microalgae.

**Table S6. Standardized total, direct, and indirect effects for the group mesograzers absent in model B (BMA PP)**

|                                      | Warm   | Acid   | Warm × acid | Sediment fauna | Macroalgae | Zostera | Light |
|--------------------------------------|--------|--------|-------------|----------------|------------|---------|-------|
| <b>Standardized total effects</b>    |        |        |             |                |            |         |       |
| Sediment fauna                       | 0.680  | 0.038  | 0.526       | 0.000          | 0.000      | 0.000   | 0.000 |
| Macroalgae                           | 0.214  | -0.221 | 0.629       | -0.459         | 0.000      | 0.000   | 0.000 |
| Zostera                              | 0.146  | 0.311  | 0.608       | -0.054         | 0.117      | 0.000   | 0.000 |
| Light                                | -0.400 | 0.016  | -0.397      | 0.269          | -0.586     | -0.053  | 0.000 |
| BMA PP                               | 0.090  | -0.036 | -0.367      | -0.127         | -0.150     | 0.051   | 0.034 |
| <b>Standardized direct effects</b>   |        |        |             |                |            |         |       |
| Sediment fauna                       | 0.680  | 0.038  | 0.562       | 0.000          | 0.000      | 0.000   | 0.000 |
| Macroalgae                           | 0.526  | -0.204 | 0.887       | -0.459         | 0.000      | 0.000   | 0.000 |
| Zostera                              | 0.121  | 0.337  | 0.534       | 0.000          | 0.117      | 0.000   | 0.000 |
| Light                                | -0.268 | -0.096 | 0.000       | 0.000          | -0.580     | -0.053  | 0.000 |
| BMA PP                               | 0.259  | -0.075 | -0.190      | -0.196         | -0.136     | 0.053   | 0.034 |
| <b>Standardized indirect effects</b> |        |        |             |                |            |         |       |
| Sediment fauna                       | 0.000  | 0.000  | 0.000       | 0.000          | 0.000      | 0.000   | 0.000 |
| Macroalgae                           | -0.312 | -0.018 | -0.258      | 0.000          | 0.000      | 0.000   | 0.000 |
| Zostera                              | 0.025  | -0.026 | 0.074       | -0.054         | 0.000      | 0.000   | 0.000 |
| Light                                | -0.132 | 0.112  | -0.397      | 0.269          | -0.006     | 0.000   | 0.000 |
| BMA PP                               | -0.168 | 0.039  | -0.177      | 0.069          | -0.014     | -0.002  | 0.000 |

Total effects are the sum of all direct and indirect effects. Direct effects are the direct effects of one variable on another variable, and indirect effects are sum of all products affecting one variable (e.g., the indirect effect of WARM on ALGAE is the product of the path between WARM → FAUNA and FAUNA → ALGAE). BMA, benthic microalgae; PP, primary production.

**Table S7. Standardized total, direct, and indirect effects for the group mesgrazers present in model B (BMA PP)**

|                                      | Warm   | Acid   | Warm × acid | Sediment fauna | Macroalgae | Zostera | Light  |
|--------------------------------------|--------|--------|-------------|----------------|------------|---------|--------|
| <b>Standardized total effects</b>    |        |        |             |                |            |         |        |
| Sediment fauna                       | 0.183  | 0.061  | 0.351       | 0.000          | 0.000      | 0.000   | 0.000  |
| Macroalgae                           | -0.115 | -0.261 | 0.356       | 0.234          | 0.000      | 0.000   | 0.000  |
| Zostera                              | 0.124  | 0.311  | -0.029      | 0.023          | 0.096      | 0.000   | 0.000  |
| Light                                | 0.103  | 0.168  | -0.188      | -0.119         | -0.510     | 0.113   | 0.000  |
| BMA PP                               | 0.245  | -0.144 | -0.404      | 0.208          | 0.060      | 0.009   | -0.279 |
| <b>Standardized direct effects</b>   |        |        |             |                |            |         |        |
| Sediment fauna                       | 0.183  | 0.061  | 0.351       | 0.000          | 0.000      | 0.000   | 0.000  |
| Macroalgae                           | -0.157 | -0.275 | 0.274       | 0.234          | 0.000      | 0.000   | 0.000  |
| Zostera                              | 0.135  | 0.307  | -0.063      | 0.000          | 0.096      | 0.000   | 0.000  |
| Light                                | 0.029  | -0.003 | 0.000       | 0.000          | -0.521     | 0.113   | 0.000  |
| BMA PP                               | 0.223  | -0.144 | -0.492      | 0.194          | -0.086     | 0.041   | -0.279 |
| <b>Standardized indirect effects</b> |        |        |             |                |            |         |        |
| Sediment fauna                       | 0.000  | 0.000  | 0.000       | 0.000          | 0.000      | 0.000   | 0.000  |
| Macroalgae                           | 0.043  | 0.014  | 0.082       | 0.000          | 0.000      | 0.000   | 0.000  |
| Zostera                              | -0.011 | -0.025 | 0.034       | 0.023          | 0.000      | 0.000   | 0.000  |
| Light                                | 0.074  | 0.171  | -0.188      | -0.119         | 0.011      | 0.000   | 0.000  |
| BMA PP                               | 0.022  | 0.000  | 0.089       | 0.014          | 0.146      | -0.031  | 0.000  |

Total effects are the sum of all direct and indirect effects. Direct effects are the direct effects of one variable on another variable, and indirect effects are sum of all products affecting one variable (e.g., the indirect effect of WARM on ALGAE is the product of the path between WARM → FAUNA and FAUNA → ALGAE). BMA, benthic microalgae; PP, primary production.

**Table S8. Properties of the carbonate system after running the experiment for 15 of 35 d in total**

| Properties of the carbonate system                       | No warming/no acidification | Warming/no acidification | No warming/acidification | Warming/acidification |
|----------------------------------------------------------|-----------------------------|--------------------------|--------------------------|-----------------------|
| <b>Day 15</b>                                            |                             |                          |                          |                       |
| Salinity                                                 | 22.89 ± 0.1                 | 23.07 ± 0.1              | 22.88 ± 0.1              | 23.13 ± 0.1           |
| Temperature, °C                                          | 19.45 ± 0.3                 | 23.31 ± 0.4              | 19.50 ± 0.3              | 23.29 ± 0.4           |
| TA, mmol·kg SW <sup>-1</sup>                             | 1,635 ± 76.4                | 1,707 ± 71.6             | 1,708 ± 107.0            | 1,726 ± 145.9         |
| tCO <sub>2</sub> , mmol·kg SW <sup>-1</sup>              | 1,442 ± 62.3                | 1,437 ± 59.4             | 1,620 ± 101.4            | 1,620 ± 137.3         |
| pH                                                       | 8.21 ± 0.01                 | 8.22 ± 0.01              | 7.86 ± 0.01              | 7.86 ± 0.1            |
| HCO <sub>3</sub> <sup>-</sup> , mmol·kg SW <sup>-1</sup> | 1,220 ± 52                  | 1,302 ± 50.4             | 1,528 ± 95.1             | 1,517 ± 128.3         |
| CO <sub>3</sub> <sup>2-</sup> , mmol·kg SW <sup>-1</sup> | 137.2 ± 11.0                | 164.5 ± 13.9             | 73.22 ± 8.6              | 85.08 ± 15.4          |
| CO <sub>2</sub> , mmol·kg SW <sup>-1</sup>               | 7.15 ± 0.3                  | 6.42 ± 0.5               | 18.68 ± 1.9              | 17.16 ± 2.9           |
| Ω calcite                                                | 3.56 ± 0.3                  | 4.32 ± 0.4               | 1.90 ± 0.2               | 2.23 ± 0.4            |
| Ω aragonite                                              | 2.22 ± 0.2                  | 2.72 ± 0.2               | 1.18 ± 0.1               | 1.40 ± 0.3            |
| pCO <sub>2</sub> , ppm                                   | 204 ± 7.8                   | 204 ± 15.5               | 534 ± 55.9               | 545 ± 93.1            |
| <b>Day 28</b>                                            |                             |                          |                          |                       |
| Salinity                                                 | 28.65 ± 0.2                 | 28.83 ± 0.2              | 28.55 ± 0.4              | 28.45 ± 1.5           |
| Temperature, °C                                          | 17.95 ± 0.2                 | 21.01 ± 0.5              | 17.92 ± 0.2              | 21.32 ± 0.4           |
| TA, mmol·kg SW <sup>-1</sup>                             | 1,441 ± 45.7                | 1,496 ± 80.7             | 1,524 ± 114.9            | 1,561 ± 102.7         |
| TCO <sub>2</sub> , mmol·kg SW <sup>-1</sup>              | 1,280 ± 36.3                | 1,286 ± 63.9             | 1,440 ± 112.1            | 1,460 ± 94.7          |
| pH                                                       | 8.07 ± 0.02                 | 8.14 ± 0.07              | 7.80 ± 0.05              | 7.81 ± 0.05           |
| HCO <sub>3</sub> <sup>-</sup> , mmol·kg SW <sup>-1</sup> | 1,169 ± 33.4                | 1,154 ± 52.6             | 1,358 ± 106.5            | 1,369 ± 87.6          |
| CO <sub>3</sub> <sup>2-</sup> , mmol·kg SW <sup>-1</sup> | 102.14 ± 4.6                | 131.15 ± 22.1            | 63.09 ± 7.3              | 74.03 ± 9.9           |
| CO <sub>2</sub> , mmol·kg SW <sup>-1</sup>               | 8.29 ± 0.4                  | 6.34 ± 1.6               | 18.23 ± 2.4              | 16.72 ± 1.7           |
| Ω calcite                                                | 2.54 ± 0.1                  | 3.64 ± 1.4               | 1.57 ± 0.2               | 1.85 ± 0.2            |
| Ω aragonite                                              | 1.62 ± 0.07                 | 2.33 ± 0.9               | 1.00 ± 0.1               | 1.19 ± 0.2            |
| pCO <sub>2</sub> , ppm                                   | 233 ± 11.2                  | 206 ± 30.4               | 514 ± 68.5               | 518 ± 53.8            |

SW, sea water; TA, total alkalinity. Shown are means ± 1 SD; n = 15. Reproduced from (1). Copyright Blackwell Publishing Ltd/CNRS.

1. Eklöf JS, et al. (2012) Experimental climate change weakens the insurance effect of biodiversity. *Ecol Lett* 15(8):864–872.
